# Supplementary material for: Computational prediction and experimental validation of a novel synthesized pan-PIM inhibitor PI003 and its apoptosis-inducing mechanisms in cervical cancer
Source: PubMed Central journal article supplement (PMC4480732; doi:10.18632/oncotarget.3139), 2015-02-04
Supplement: oncotarget-06-8019-s001.pdf [file oncotarget-06-8019-s001.pdf]

## SUPPLEMENTARY FIGURE AND TABLE

|      |     |       |           |              |                     |              |         |         |                 |        |        |       |       |       |      |
|------|-----|-------|-----------|--------------|---------------------|--------------|---------|---------|-----------------|--------|--------|-------|-------|-------|------|
| PIM1 | 129 | YQVGP | LLGSGGFG  | <u>SVYSG</u> | IRVSDNLPVAIKHVEKDRI | SDWGE        | LPNGTRV | PMEVLLK | KVS             |        |        |       |       |       |      |
| PIM2 | 32  | YRLGP | LLGKGGFG  | TVFAG        | HRLTDRLQVAIKVIPRNRV | LGWSP        | LSDSVTC | PLEVALL | KVG             |        |        |       |       |       |      |
| PIM3 | 40  | YQVGA | VLLGSGGFG | TVYAG        | SRIADGLPVAVKHVV     | KERVTE       | WGS     | LGGATV  | PLEVLLR         | KVG    |        |       |       |       |      |
|      |     |       |           |              |                     |              |         |         |                 |        |        |       |       |       |      |
| PIM1 | 189 | S     | -GFS      | GVIRLLD      | WFERPDS             | <u>SVLIL</u> | ERPEPV  | QDLDF   | FITERGALQEELARS | FFWQV  | LEAV   |       |       |       |      |
| PIM2 | 92  | AGGG  | HPGVIRLLD | WFETQ        | EGFMLVLERPL         | PAQDL        | LDYITE  | KGPLG   | EGSP            | RCCFFG | QVVA   | IR    |       |       |      |
| PIM3 | 99  | AAGG  | ARGVIRLLD | WFERPD       | GFLLV               | LERPE        | PAQDL   | LDYITE  | KGPLG           | EGSP   | RCCFFG | QVVA  | IR    |       |      |
|      |     |       |           |              |                     |              |         |         |                 |        |        |       |       |       |      |
| PIM1 | 247 | RHCH  | NCGV      | LHRDI        | KDENILIDL           | NRGEL        | KLIDFG  | SGALL   | KDVTY           | DFD    | GRVY   | SPPEW | IRY   |       |      |
| PIM2 | 152 | QHCH  | SRGV      | VHRDI        | KDENILIDL           | RRGCA        | KLIDFG  | SGALL   | HDE             | PYTFD  | GRVY   | SPPEW | ISR   |       |      |
| PIM3 | 159 | RHCH  | SCGV      | VHRDI        | KDENLL              | VDLR         | SGEL    | KLIDFG  | SGALL           | KDVTY  | DFD    | GRVY  | SPPEW | IRY   |      |
|      |     |       |           |              |                     |              |         |         |                 |        |        |       |       |       |      |
| PIM1 | 307 | HRYH  | GRSA      | AVWS         | LGYLL               | DMVCG        | DIPFE   | HDEE    | IRGQ            | VFFR   | QRVS   | SECQ  | HLIR  | WCLAL | LRP  |
| PIM2 | 212 | HQYH  | ALPAT     | VWSL         | GILGYLL             | DMVCG        | DIPFER  | DQEIL   | EAEL            | HFP    | AHVSP  | DCCAL | IR    | RCLAP | KP   |
| PIM3 | 219 | HRYH  | GRSAT     | VWSL         | GVLLY               | DMVCG        | DIPFE   | QDEE    | ILRG            | LLFR   | RRVS   | SPECQ | QLIR  | WCL   | SLRP |
|      |     |       |           |              |                     |              |         |         |                 |        |        |       |       |       |      |
| PIM1 | 367 | SDR   | PTFEE     | IQN          | HPWM                |              |         |         |                 |        |        |       |       |       |      |
| PIM2 | 272 | SSR   | PSLEE     | ILL          | DPWM                |              |         |         |                 |        |        |       |       |       |      |
| PIM3 | 279 | SER   | PSLDQ     | IAA          | HPWM                |              |         |         |                 |        |        |       |       |       |      |

A

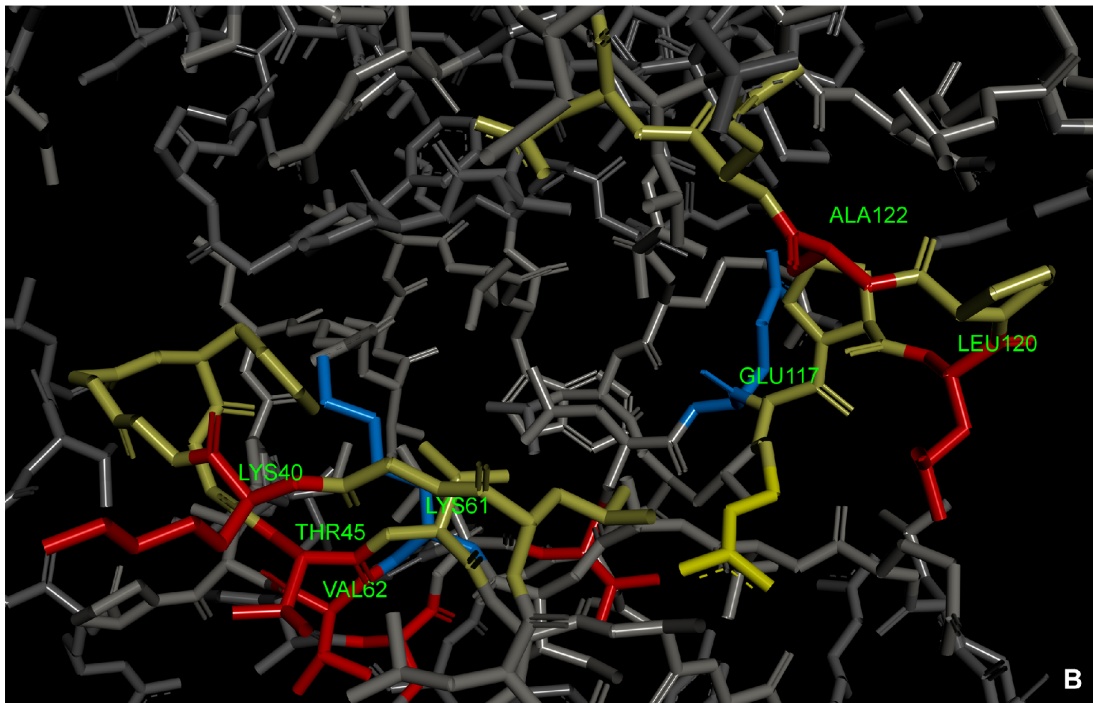

B

**Supplementary Figure S1: Sequence alignment of kinase domains and structure-based differences between PIM1 and PIM2.** (A) Sequence alignment of kinase domains of PIM1, PIM2 and PIM3, the differences are underlined with red background or words. The amino acids that form part of the ATP binding are marked with blue boxes; (B) The active site (yellow) of PIM2, LYS40, THR45, VAL62, LEU120 and ALA122 (red) are differences in the protein sequence. LYS61 and GLU117 (blue) are amino acids with conformational differences between PIM1 and PIM2, which influence the effect on PIM2 of PIM1 inhibitors with crystallographic structure.

**Supplementary Table S1: The MTT assay of candidate small-molecule PIM inhibitors from Drugbank**

| Number | Name                        | CAS NO.     | Structure                                                                            | Inhibitory ratio (%) |
|--------|-----------------------------|-------------|--------------------------------------------------------------------------------------|----------------------|
| P1     | Carvedilol                  | 72956-09-3  | 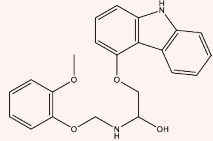   | 51.77537144          |
| P2     | Lansoprazole                | 103577-45-3 |    | 22.66431629          |
| P3     | Benserazide hydrochloride   | 14919-77-8  |    | 10.12339461          |
| P4     | Rosiglitazone hydrochloride | 302543-62-0 |    | 46.81440443          |
| P5     | Troglitazone                | 97322-87-7  |  | 6.925207756          |
| P6     | Metformin HCL               | 1115-70-4   |  | 11.20624528          |
| P7     | Propranolol Hydrochloride   | 318-98-9    |  | 3.878116343          |
| P8     | thioridazine hydrochloride  | 130-61-0    |  | 59.12868295          |
| P9     | Chlorpromazine              | 50-53-3     |  | 93.95618232          |

(Continued)

| Number | Name                       | CAS NO.     | Structure | Inhibitory ratio (%) |
|--------|----------------------------|-------------|-----------|----------------------|
| P10    | Hydroxychloroquine sulfate | 747-36-4    |           |                      |
| P11    | Primaquine diphosphate     | 63-45-6     |           | 39.56182322          |
| P12    | Ethambutol Hydrochloride   | 1070-11-7   |           | 10.75295895          |
| P13    | Lincomycin Hydrochloride   | 859-18-7    |           | 29.84134979          |
| P14    | cisapride                  | 81098-60-4  |           | 38.10123395          |
| P15    | xantinol nicotinate        | 437-74-1    |           | 11.45807101          |
| P16    | Valaciclovir               | 124832-26-4 |           |                      |
| P17    | Fluoxetine hydrochloride   | 56296-78-7  |           | 12.36464367          |
| P18    | Flavoxate Hydrochloride    | 3717-88-2   |           | -1.284311257         |

(Continued)

| Number | Name                       | CAS NO.    | Structure                                                                          | Inhibitory ratio (%) |
|--------|----------------------------|------------|------------------------------------------------------------------------------------|----------------------|
| P19    | Formoterol Fumarate        | 43229-80-7 | 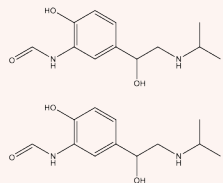 | 0.138504155          |
| P20    | Daunorubicin hydrochloride | 23541-50-6 |  | 91.26164694          |
